# Supplementary material for: Stably transmitted defined microbial community in honeybees preserves Hafnia alvei inhibition by regulating the immune system
Source: PubMed Central journal article supplement (PMC9751035; doi:10.3389/fmicb.2022.1074153), 2022-12-01
Supplement: Image_1.pdf [file Image_1.pdf]

## Supplementary Information

**Table S1. qPCR primer sequences for gene expression and bacterial load**

| Gene          | Forward                | Reverse                 | Reference           |
|---------------|------------------------|-------------------------|---------------------|
| Toll          | TAGAGTGGCGCATTGTCAAG   | ATCGCAATTTGTCCCAAAC     | (Lang et al., 2022) |
| Spz4          | CAACGAATTCAGGGACGAGG   | AGTAGTGCCGGGAAATTC      | This study          |
| Cactus-1      | CTATCGTGGAGAACTGCGTAT  | TCAGGAAGTGGTTCTGGTATTG  | (Lang et al., 2022) |
| Cactus-2      | ATCAGACGGCTCTGCTCTAT   | TCGTCTTCGTCAGTGGTATCT   | (Lang et al., 2022) |
| Dorsal        | AGAGATGGAACGCAGGAAAC   | TGACAGGATATAGGACGAGGTAA | (Lang et al., 2022) |
| PGRP-LC       | TCCGTCAGCCGTAGTTTTTC   | CGTTTGTGCAAATCGAACAT    | (Lang et al., 2022) |
| Dredd         | GCGTCATAAAGAAAAAGGATCA | TTTCGGGTAATTGAGCAACG    | (Lang et al., 2022) |
| Relish        | GGAGCTGATCCAAATCGAAC   | AGTGGCATCCATCCATCATT    | (Lang et al., 2022) |
| Abaecin       | TCGGATTGAATGGTCCCTGAC  | ATCTTCGCACTACTCGCCAC    | (Lang et al., 2022) |
| Apidaecin     | GTAGGTCGAGTAGGCGGATCT  | TTTTGCCTTAGCAATCCTTGTTG | (Lang et al., 2022) |
| Hymenoptaecin | GTCGTCCATCCTTGGACATT   | TTCCCAAACCTCGAATCCTG    | (Lang et al., 2022) |
| Defensin-1    | TGCGCTGCTAACTGTCTCAG   | AATGGCACTTAACCGAAACG    | (Lang et al., 2022) |
| Defensin-2    | GCAACTACCGCCTTTACGTC   | GGGTAACGTGCGACGTTTTA    | (Lang et al., 2022) |
| Lysozyme      | ACACGGTTGGTCACTGGTCC   | GTCCCACGCTTTGAATCCCT    | (Lang et al., 2022) |
| Hafnia        | CGAGGAGGAAGGCATTGTGG   | CCCAAGTTAAGCTCGGGGAT    | (Lang et al., 2022) |
| Actin         | TGCCAACACTGTCCTTTCTG   | AGAATTGACCCACCAATCCA    | (Lang et al., 2022) |
